1

2     **Evaluating survey techniques in wastewater-based epidemiology for accurate**  
3                                   **COVID-19 incidence estimation**

4

5                   Michio Murakami<sup>a,\*</sup>, Hiroki Ando<sup>b,c</sup>, Ryo Yamaguchi<sup>d</sup>, Masaaki Kitajima<sup>a,b,e</sup>

6

7     <sup>a</sup> Center for Infectious Disease Education and Research, Osaka University, 2-8 Yamadaoka, Suita-  
8     shi, Osaka 565-0871, Japan

9     <sup>b</sup> Division of Environmental Engineering, Faculty of Engineering, Hokkaido University, North 13  
10    West 8, Kita-ku, Sapporo, Hokkaido 060-8628, Japan

11    <sup>c</sup> Mel and Enid Zuckerman College of Public Health, University of Arizona, Tucson, Arizona 85724,  
12    United States

13    <sup>d</sup> Public Health Office, City of Sapporo, West 19, Odori, Chuo-ku, Sapporo, Hokkaido, 060-0042,  
14    Japan

15    <sup>e</sup> Research Center for Water Environment Technology, School of Engineering, The University of  
16    Tokyo, 2-11-16 Yayoi, Bunkyo-ku, Tokyo 113-0032, Japan

17

18    \* Corresponding author: [michio@cider.osaka-u.ac.jp](mailto:michio@cider.osaka-u.ac.jp)

19

20    **Abstract**

21 Wastewater-based epidemiology (WBE) requires high-quality survey methods to determine the  
22 incidence of infections in catchment areas. In this study, the wastewater survey methods necessary  
23 for comprehending the incidence of infection by WBE are clarified. This clarification is based on  
24 the correlation with the number of confirmed coronavirus disease 2019 (COVID-19) cases,  
25 considering factors such as handling non-detect data, calculation method for representative values,  
26 analytical sensitivity, analytical reproducibility, sampling frequency, and survey duration. Data  
27 collected from 15 samples per week for two and a half years using a highly accurate analysis  
28 method were regarded as gold standard data, and the correlation between severe acute respiratory  
29 syndrome coronavirus 2 (SARS-CoV-2) RNA concentrations in wastewater and confirmed COVID-  
30 19 cases was analyzed by Monte Carlo simulation under the hypothetical situation where the quality  
31 of the wastewater survey method was reduced. Regarding data handling, it was appropriate to  
32 replace non-detect data with estimates based on distribution, and to use geometric means to  
33 calculate representative values. For the analysis of SARS-CoV-2 RNA in samples, using a highly  
34 sensitive and reproducible method (non-detect rates of  $< 40\%$ ;  $\leq 0.4$  standard deviation) and  
35 surveying at least three samples, preferably five samples, per week were considered desirable.  
36 Furthermore, conducting the survey over a period of time that included at least 50 weeks was  
37 necessary. A WBE that meets these survey criteria is sufficient for the determination of the COVID-  
38 19 infection incidence in the catchment area. Furthermore, WBE can offer additional insights into  
39 infection rates in the catchment area, such as the estimated 48% decrease in confirmed COVID-19  
40 cases visiting a clinic following a COVID-19 legal reclassification in Japan.

41

42 **Keywords**

43 Analytical sensitivity; Data handling; SARS-CoV-2; Sampling frequency; Wastewater surveillance;  
44 Wastewater-based epidemiological monitoring

45

46 **1. Introduction**

47 Wastewater-based epidemiology (WBE), also known as wastewater surveillance, is an economical,  
48 representative, and early means of determining the incidence of infection in a target area without  
49 requiring personal information (Hart and Halden, 2020; Kitajima et al., 2020; Murakami et al.,  
50 2020; Shah et al., 2022). The WBE has been applied since the 1990s as a method to comprehend the  
51 infection incidence of polio (Grabow et al., 1999). Since the beginning of the coronavirus disease  
52 2019 (COVID-19) pandemic, numerous studies have been conducted on correlations between  
53 concentrations of severe acute respiratory syndrome coronavirus 2 (SARS-CoV-2) RNA in  
54 untreated wastewater and the infection incidence of catchments (Ahmed et al., 2020; La Rosa et al.,  
55 2020; Randazzo et al., 2020). The WBE has been applied to other respiratory infections, such as  
56 influenza (Schoen et al., 2023; Toribio-Avedillo et al., 2023). Monitoring the infection incidence  
57 using WBE provides information that can contribute to public health, such as identifying the origin  
58 of infection, promoting infection control measures, including testing and vaccination campaigns in  
59 targeted areas, and preparing resource allocation in healthcare institutions (Betancourt et al., 2021;  
60 Karthikeyan et al., 2022; Kitajima et al., 2022; Klapsa et al., 2022; Li et al., 2023a).

61 In Japan, where comprehensive notifiable disease surveillance of the number of COVID-19-infected  
62 individuals has been conducted, a high correlation (Pearson's  $r = 0.94$ ) was reported between the  
63 number of newly confirmed COVID-19 cases and SARS-CoV-2 RNA concentrations in wastewater  
64 through a two-year sampling campaign with twice-weekly sample collection using an analytical  
65 method that is highly reproducible and capable of quantifying low concentrations of viral RNA  
66 (Ando et al., 2023). In contrast, several factors influence the correlation between the virus  
67 concentration in wastewater and the number of infected individuals in the catchment area. These  
68 factors are categorized as clinical, environmental, and wastewater survey methods (Li et al., 2023b).  
69 The clinical factors include COVID-19 prevalence and testing coverage. Environmental factors  
70 include changes in air temperature and the catchment size of the wastewater treatment plants.  
71 Factors related to wastewater survey methods include the sampling frequency (i.e., the number of  
72 samples per week). Additionally, the survey duration and virus detection methods, such as analytical  
73 reproducibility and quantification at low virus concentrations (analytical sensitivity) in wastewater,  
74 are also relevant (Li et al., 2021; Medema et al., 2020). Li et al. (2023b) conducted a systematic  
75 review of the correlations between SARS-CoV-2 RNA concentrations in wastewater and infection  
76 incidence and reported that COVID-19 prevalence, testing coverage, air temperature variation,  
77 catchment size, and sampling frequency were more likely to be associated with the strength of the  
78 correlations, whereas the sampling method (i.e., grab or composite sampling) had a smaller effect.  
79 Kuroita et al. (2024) reported that at least two samples per week are required to reduce variations in  
80 viral concentrations in wastewater to obtain a strong correlation with confirmed COVID-19 cases,

81 irrespective of differences in the type of sewer system (i.e., combined or separated sewer system),  
82 sampling method, and areas (i.e., urban or suburban areas).

83 The World Health Organization declared the end of the Public Health Emergency of International  
84 Concern on May 5, 2023. The number of infected individuals has shifted towards partial monitoring  
85 worldwide. Japan reclassified COVID-19 legal status into the fifth category of communicable  
86 diseases under the Communicable Diseases Law on May 8, 2023, and also shifted from  
87 comprehensive notifiable disease surveillance to sentinel surveillance, in which only the designated  
88 health facilities report the number of COVID-19 cases seen there. As its clinical ability to ascertain  
89 the incidence of infection has declined, the utility of WBE has increased. Therefore, it is important  
90 to identify effective survey methods for the WBE that can adequately account for the number of  
91 infected individuals in the target areas. Among the aforementioned clinical factors, environmental  
92 factors, and wastewater survey methods, wastewater survey methods can be handled by the  
93 implementers of the WBE in a target area. However, no studies have comprehensively examined the  
94 appropriate wastewater survey methods in terms of sampling frequency, survey duration, analytical  
95 sensitivity, and reproducibility.

96 This study aimed to clarify the survey methods necessary for understanding the incidence of WBE  
97 infection based on the correlation with confirmed COVID-19 cases. First, the handling of non-  
98 detect data and the calculation of representative values were investigated. Second, the sampling  
99 frequency, survey duration, analytical sensitivity, and analytical reproducibility necessary to  
100 determine the infection incidence through WBE were analyzed. For the sampling frequency, the

101 correlation between surveys conducted at two or three different catchment areas on the same day of  
102 the week and those conducted at the same catchment area on two or three different days of the week  
103 was also examined. Additionally, changes in the relationship between virus concentrations and  
104 confirmed COVID-19 cases were analyzed, considering the behavior of individuals visiting health  
105 facilities before and after the legal reclassification of COVID-19 in Japan.

106

## 107 **2. Methods**

### 108 *2.1. Data*

109 In this study, WBE measurements over two and a half years with high analytical accuracy and  
110 sampling frequency were used as “gold data,” and the strength of the correlation coefficient with the  
111 confirmed COVID-19 cases was analyzed under the condition that the quality of wastewater survey  
112 methods would decline. WBE data obtained through a survey commissioned by the City of Sapporo  
113 and Hokkaido University were used in the analysis. Specifically, this study used data on SARS-  
114 CoV-2 RNA concentrations in untreated wastewater (24-hour composite samples) collected three  
115 times a week (Monday, Wednesday, and Friday in principle) at each of the five catchment areas  
116 covered by three adjacent wastewater treatment plants in the City of Sapporo from April 12, 2021,  
117 to September 29, 2023. Pepper mild mottle virus (PMMoV) RNA was also measured from  
118 September 27, 2021, to September 29, 2023. The population and area of the City of Sapporo were  
119 1.96 million and 1,121 km<sup>2</sup> in 2023, respectively. The population covered in each catchment area,  
120 estimated from the overall facility’s treated population and wastewater flow volume, ranged from

121 165,000 to 246,000, and the five catchment areas together covered 52% of Sapporo's population.

122 If fewer than 15 samples were collected per week, data from the corresponding week were excluded

123 from the analysis.

124 The limit of detection (LOD) for SARS-CoV-2 RNA by the Efficient and Practical virus

125 Identification System with ENhanced Sensitivity for Solids (EPISENS-S), the viral RNA detection

126 method used in this study, was 93.1 copies/L, corresponding to approximately one-hundredth that of

127 the common polyethylene glycol precipitation method (Ando et al., 2022). The reproducibility of

128 the SARS-CoV-2 analysis ranged from 0.03 to 0.4 standard deviation at  $\log_{10}$  values (Ando et al.,

129 2022). A total of 15 weekly samples were analyzed over 122 weeks, with a total of 1,830 samples

130 and 201 samples below the LOD (i.e., non-detect samples).

131 Two types of clinical data were used for the confirmed COVID-19 cases: comprehensive, notifiable

132 disease surveillance and sentinel surveillance. For the former, published data up to May 7, 2023,

133 were used (City of Sapporo, 2024; Data-smart City Sapporo, 2023), and a moving average of the

134 number of newly confirmed COVID-19 cases for a week was calculated using the three days before

135 and after a representative date of wastewater sampling (arithmetic mean of sampling dates). The

136 comprehensive, notifiable disease surveillance data contained 1,515 wastewater samples collected

137 over 101 weeks. Regarding the sentinel surveillance data, the confirmed COVID-19 cases per

138 sentinel health facility contained two types of data sources: estimation from the comprehensive

139 notifiable disease surveillance data from October 3, 2022, to May 7, 2023 (the confirmed COVID-

140 19 cases in the comprehensive notifiable disease surveillance during the epidemiological week

141 multiplied by 0.091891 and divided by 56 sentinel health facilities (Ministry of Health Labour and  
142 Welfare, 2023)) and published data thereafter (City of Sapporo, 2024). The sentinel surveillance  
143 data comprised 735 wastewater samples collected over a period of 49 weeks. Figure 1 shows the  
144 temporal trends of SARS-CoV-2 RNA concentrations in wastewater and confirmed COVID-19  
145 cases. The confirmed COVID-19 cases comprised five infection waves in two years for the  
146 comprehensive notifiable disease surveillance data period and two infection waves in one year for  
147 the sentinel surveillance data period.

148

149 *2.2. Treatment of non-detect data and calculation method of representative values (Preliminary*  
150 *analysis I)*

151 In this study, Pearson's correlation coefficient  $r$  was calculated between the  $\log_{10}$  values of  
152 representative SARS-CoV-2 RNA concentrations in wastewater for one week and the  $\log_{10}$  values  
153 of the confirmed COVID-19 cases for one week (hereafter, a correlation represents that between  
154 SARS-CoV-2 RNA concentration in wastewater and the confirmed COVID-19 cases unless  
155 otherwise noted). To examine the treatment of non-detect data and the method for calculating  
156 representative values, the correlation coefficients were analyzed as follows: First, the non-detect  
157 data were replaced with four types of values: (1) LOD, (2) LOD/2, (3)  $\text{LOD}/\sqrt{2}$ , and (4) the value  
158 corresponding to half of the non-detect rate using the estimated distribution (hereinafter, distribution  
159 estimates). The replacement values for (1)–(3) are often used, as previously reported (Croghan and  
160 Egeghy, 2003). The replacement value for (4) was calculated using the maximum likelihood method,



161 assuming a lognormal distribution for all 1,830 left-censored data points. The R package “NADA”  
162 was used to estimate the distribution (Lee, 2022; R Development Core Team, 2021). The arithmetic  
163 mean, geometric mean, and median values were calculated for one week using the dataset with non-  
164 detect data replaced in this manner. Conditions with high correlation coefficients were extracted  
165 using a comprehensive notifiable disease surveillance data set (n = 1,515) with a range of -7 to +14  
166 days (time lag) from the representative date of wastewater sampling to the published date of the  
167 confirmed COVID-19 cases. For this analysis, three types of corrections were calculated: (a) LOD  
168 = 93.1 copies/L without correction by PMMoV; (b) LOD = 93.1 copies/L with correction by  
169 PMMoV (using the ratio of SARS-CoV-2 RNA concentration to PMMoV RNA concentration  
170 instead of SARS-CoV-2 RNA concentration); and (c) LOD = 9,310 copies/L and without correction  
171 by PMMoV.

172 Based on this analysis, the following conditions were used to calculate correlation coefficients in  
173 subsequent analyses: replacement by distribution estimates, calculation of the geometric mean, no  
174 time lag (+0 days), and no correction using PMMoV (detailed in Section 3.1).

175

### 176 *2.3. Correction of sentinel surveillance data (Preliminary analysis 2)*

177 In the analysis using the sentinel surveillance dataset, the relationship between virus concentration  
178 and confirmed COVID-19 cases changed before and after the legal reclassification of COVID-19 in  
179 Japan, which might have resulted in behavioral changes in individuals visiting health facilities.  
180 Therefore, a multiple regression analysis was conducted with confirmed COVID-19 cases ( $\log_{10}$ ) as

181 the objective variable and SARS-CoV-2 RNA concentration ( $\log_{10}$ ) and a dummy variable for  
182 reclassification as explanatory variables. The dummy variable was set to 0 for the period before  
183 reclassification and 1 for the period after reclassification. IBM SPSS version 28 was used for all the  
184 analyses. Based on these results, in subsequent analyses, the confirmed COVID-19 cases per  
185 sentinel medical ( $\log_{10}$ ) after the reclassification was treated as a corrected value by doing +0.32  
186 (detailed in Section 3.2).

187

#### 188 *2.4. Assessment of survey methods based on correlations with the confirmed COVID-19 cases*

189 Main analyses 1–4 were conducted to determine the sampling frequency, survey duration, analytical  
190 sensitivity, and analytical reproducibility required to adequately explain the number of infected  
191 individuals.

192

##### 193 Main analysis 1: analytical sensitivity and sampling frequency

194 Conditions with LODs of 93.1, 186.2, 465.5, 931, 1,862, 4,655, 9,310, 18,620, and 46,550 copies/L  
195 (corresponding to 1, 2, 5, 10, 20, 50, 100, 200, and 500 times the actual values in the dataset,  
196 respectively) were established. Hypothetically, by resetting these LODs, the data were treated as  
197 non-detect (for example, data detected as 100 copies/L were considered non-detect under the  
198 condition of an LOD of 186.2 copies/L). For each condition, as described in Section 2.2,  
199 replacement values based on distribution estimation for left-censored data were used as non-detect  
200 data (Table S1).

201 Furthermore, under these LOD conditions, 1–15 samples were assumed to be collected weekly. This  
202 corresponds to a hypothetical reduction in the total sampling frequency to 15 samples per week. The  
203 catchment areas and days of the week to be sampled were randomly determined according to the  
204 sampling frequencies and fixed for the duration of the WBE survey (same as in Main analysis 2 to  
205 4).

206

207 Main analysis 2: Multiple catchment areas on the same day of the week and same catchment areas  
208 on multiple days of the week

209 Given that two or three samples were collected per week, the analysis compared collection in two or  
210 three catchment areas on the same day of the week with collection in identical catchment areas two  
211 or three times per week. The catchment areas and days of the week were randomly determined  
212 according to the sampling frequencies from the five catchment areas or three days of the week.

213

214 Main analysis 3: Survey duration and sampling frequency

215 Different survey durations of 101, 12, 25, 50, and 75 weeks were established from a comprehensive,  
216 notifiable disease surveillance dataset. The first week of the survey was randomly selected, and  
217 consecutive weeks were selected. The sampling frequency was analyzed from 1 to 15, as in the  
218 Main analysis. Only comprehensive, notifiable disease surveillance data were used in this analysis.

219

220 Main analysis 4: Analytical reproducibility and sampling frequency

221 The analysis assumed conditions under which the analytical reproducibility of SARS-CoV-2 RNA  
222 concentrations varied. In accordance with a previous report (Ando et al., 2022), the standard  
223 deviation of this dataset was conservatively regarded as 0.4 at  $\log_{10}$  values. Since the number of  
224 analyses in this dataset was one for each sample, the “true value” was estimated from the normal  
225 distribution when the “measured value” at  $\log_{10}$  values was taken as the arithmetic mean and the  
226 standard deviation as 0.4. The hypothetically measured values were then estimated with standard  
227 deviations of 0.4, 0.6, 0.8, and 1, respectively. The sampling frequency was analyzed from 1 to 15,  
228 as in the Main analysis 1.

229

230 Under all conditions, the correlation coefficient between the SARS-CoV-2 RNA concentration in  
231 wastewater and the confirmed COVID-19 cases for one week was calculated using Monte Carlo  
232 simulations with 10,000 iterations for each. Oracle Crystal Ball version 11.1.2.4.900 was used for  
233 analysis. The arithmetic means and 95% uncertainty intervals calculated from the 2.5th and 97.5th  
234 percentile values among the 10,000 iterations were used. The conditions were extracted such that  
235 the 2.5th percentile value was greater than 0.7.

236

### 237 **3. Results**

238 *3.1. Treatment of non-detect data and determination of a method for calculating representative*  
239 *values*

240 Figure 2 presents the results of the Preliminary analysis 1. With regard to the treatment of non-

241 detect data, high correlation coefficients were obtained when the data were replaced with  
242 distribution estimates, or LOD/2. The correlation coefficients were high when the geometric mean,  
243 or median, was used to calculate representative values. Generally, the correlation coefficient was  
244 greatest when the time lag was approximately zero. PMMoV correction did not significantly affect  
245 the correlation coefficients.

246 Figure 3(a) shows a scatter plot of SARS-CoV-2 RNA concentrations and confirmed COVID-19  
247 cases in the comprehensive notifiable disease surveillance under the conditions of replacement by  
248 distribution estimates, calculation of geometric mean, no gap (+0 days), and no correction of SARS-  
249 CoV-2 RNA concentrations by PMMoV. The correlation coefficient was as high as 0.87, and the  
250 slope of the regression equation using the logarithm of both SARS-CoV-2 RNA concentrations and  
251 confirmed COVID-19 cases was 0.96, which is close to 1, confirming a linear relationship between  
252 them.

253

### 254 *3.2. Determination of correction values for sentinel surveillance data*

255 Multiple regression analysis (Preliminary analysis 2) showed that the unstandardized partial  
256 regression coefficients (95% confidence interval) for SARS-CoV-2 RNA concentration and  
257 reclassification were 0.80 (0.63–0.97) and  $-0.32$  ( $-0.50$ – $-0.14$ ), both significant. A scatter plot of  
258 SARS-CoV-2 RNA concentrations and corrected confirmed COVID-19 cases is shown in Figure  
259 3(b). The correlation coefficient and slope of the regression equation were 0.86 and 0.80,  
260 respectively, confirming a strong linear relationship between SARS-CoV-2 RNA concentrations in

261 wastewater and confirmed COVID-19 cases, even in the sentinel surveillance data.

262

263 *3.3. Effects of sampling frequency, survey duration, analytical sensitivity, and analytical*  
264 *reproducibility on the correlation with the confirmed COVID-19 cases*

265 The results of Main analysis 1 showed that the correlation coefficients decreased as the sampling  
266 frequencies decreased for both comprehensive notifiable disease surveillance and sentinel  
267 surveillance data (Figure 4). Large differences in correlation coefficients were found between one  
268 and two samples per week, and three samples per week showed high correlation coefficients similar  
269 to those of more frequent sampling under the measurement condition of LOD = 93.1 copies/L (2.5th  
270 percentile values: 0.80 for comprehensive notifiable disease surveillance and 0.76 for sentinel  
271 surveillance). The correlation coefficients decreased as the LOD value increased (i.e., as the non-  
272 detect rate increased): in the comprehensive notifiable disease surveillance data, there was no large  
273 difference in the correlation coefficients for the measurement conditions with LOD between 93.1  
274 and 931 copies/L (non-detect rate: 13–31%), but the correlation coefficients decreased as the LOD  
275 increased from 1,862 copies/L (non-detect rate: 42%). Fifteen samples per week, with an LOD of  
276 1,862 copies/L, did not show a higher correlation than two samples per week, with an LOD of 93.1  
277 copies/L. In the sentinel surveillance data, no large differences in the correlation coefficients were  
278 found between 93.1 and 9,310 copies/L for the LOD (non-detect rate: 0.4–34%), but the correlation  
279 coefficients decreased when the LOD was greater than 18,620 copies/L (non-detect rate: 54%). For  
280 both comprehensive notifiable disease surveillance and sentinel surveillance data, the 2.5th

281 percentile values of the correlation coefficients exceeded 0.7 for the three samples per week when  
282 the non-detect rate was less than 40%.

283 Regarding Main analysis 2, no large differences in the correlation coefficients were found between  
284 multiple catchment areas on the same day of the week and identical catchment areas on multiple  
285 days of the week (Figure 5), although slightly less variation in the correlation coefficients existed  
286 for two or three samples per week in the same catchment area than for sampling once per week in  
287 two or three catchment areas. The 2.5th percentile values of the correlation coefficients exceeded  
288 0.7 for both sampling once at three catchment areas per week and sampling three times at one  
289 catchment area per week.

290 In Main analysis 3, the 12-week surveys had lower correlation coefficients and wider uncertainty  
291 intervals (Figure 6). Compared to the 50-week or longer surveys, the 25-week surveys had similar  
292 arithmetic mean correlation coefficients but lower 2.5th percentile values. The 2.5th percentile  
293 values in the 50-week or longer surveys with three or more samples per week exceeded 0.7.

294 In Main analysis 4, as the standard deviation increased, the correlation coefficients decreased  
295 (Figure 7). In particular, the uncertainty interval widened with an increase in standard deviation  
296 when the number of samples per week was small. In the comprehensive notifiable disease  
297 surveillance data, the 2.5th percentile values of the correlation coefficients exceeded 0.7 when the  
298 standard deviation was 0.4, with three or more samples per week. In the sentinel surveillance data,  
299 the arithmetic mean value of the correlation coefficient was below 0.7 for three samples per week.  
300 The 2.5th percentile value of the correlation coefficient was 0.66 and 0.71 for the five- and seven-

301 weekly surveys, respectively.

302

#### 303 **4. Discussion**

304 Using high analytical accuracy and intensive surveys as the gold standard for WBE, this study  
305 identified the treatment of non-detect data and the appropriate method for calculating representative  
306 values, and analyzed the impact of sampling frequency, survey duration, analytical sensitivity and  
307 analytical reproducibility on the correlation between SARS-CoV-2 RNA concentration in  
308 wastewater and confirmed COVID-19 cases.

309 First, a preliminary analysis identified the appropriate treatment for non-detect data and the  
310 appropriate method for calculating representative values. The validity of treating non-detect data  
311 using distribution estimates has been discussed in a previous report (Croghan and Egeghy, 2003).

312 In this study, correlation coefficients were calculated by log-transforming virus concentrations in  
313 wastewater and confirmed COVID-19 cases. Therefore, it is reasonable to use geometric means or  
314 medians rather than arithmetic means to calculate representative values. The PMMoV correction did  
315 not improve the correlation with confirmed COVID-19 cases, which is consistent with the findings  
316 of our previous study (Ando et al., 2023). The present study performed the main analyses with a  
317 time lag of 0 days, which did not negate the early detectability of WBE. In this study, the data were  
318 merged into one-week data to calculate representative values, which indicated that it was not  
319 necessary to consider the time lag. The early detection of COVID-19 by the WBE in the same  
320 catchment area in this study has been demonstrated in detail in our previous report (Ando et al.,



2023). When non-detect data were treated in this manner and representative values were calculated, strong correlations between SARS-CoV-2 RNA concentrations in wastewater and confirmed COVID-19 cases were observed (comprehensive notifiable disease surveillance:  $r = 0.87$ , sentinel surveillance:  $r = 0.86$ ). The slope with log-transformed data was almost 1, confirming that the WBE was sufficient to determine the COVID-19 infection incidence in the catchment area. Interestingly, sentinel surveillance data showed a 0.32 decrease in confirmed COVID-19 cases at  $\log_{10}$  values after reclassification. No major change in the prevalence of SARS-CoV-2 variants was observed during this period (Our World in Data, 2024). This suggests that the reclassification of COVID-19 led to a change in individuals' healthcare-seeking behaviors, such as hesitation in receiving medical examinations, and that the number of confirmed COVID-19 cases captured by clinics decreased by half (i.e.,  $10^{-0.32} = 48\%$ ). This study highlights that the WBE can provide a good picture of the incidence of infection in catchment areas, even when changes in people's consultation behavior occur.

Regarding the analytical sensitivity, a decrease in the correlation coefficients was observed with increasing LOD values (Main analysis 1). In particular, both comprehensive notifiable disease surveillance and sentinel surveillance data showed large decreases in correlation coefficients when the non-detect rate exceeded 40%. Therefore, it is desirable to conduct the analysis with a sensitivity that the non-detect rate does not exceed 40%. The non-detect rate depends not only on the LOD but also on the incidence of infection. This result indicates that it is desirable to use a dataset with a non-detect rate of  $< 40\%$  (which is more achievable with high-sensitivity methods) to

341 discuss correlations with COVID-19 cases. Ando et al. (2023) reported that a 50% probability of  
342 detection corresponded to 0.69 out of 100,000 confirmed COVID-19 cases per day when the  
343 EPISENS for membrane (EPISENS-M) method with the LOD of 43.9 copies/L was used for SARS-  
344 CoV-2 RNA detection from wastewater.

345 Regarding the sampling frequency, large differences in the correlation coefficients existed between  
346 one and two or more samples per week (main analyses 1, 3, and 4). This is consistent with the  
347 findings of a previous study (Kuroita et al., 2024). In particular, for both comprehensive notifiable  
348 and sentinel surveillance data, a sampling frequency of three or more times per week achieved a  
349 2.5th percentile value of correlation coefficients greater than 0.7 when the non-detect rate was <  
350 40% (Main analysis 1). With three samples per week, no large difference in the correlation  
351 coefficients existed between three-day sampling in the same catchment area and one-day sampling  
352 in three different catchment areas (Main analysis 2). When the standard deviation of the analysis  
353 was 0.4 (Main analysis 4), it was considered possible to survey at least five samples per week given  
354 that the correlation coefficient was low for the three-weekly surveys in the sentinel surveillance data.

355 Regarding survey duration, the correlation coefficient was notably low at 12 weeks (Main Analysis  
356 3). At three samples per week, the 2.5th percentile values of the correlation coefficients exceeded  
357 0.7 at 50 weeks or more. To determine the incidence of COVID-19 infection in the catchment area  
358 by the WBE, a survey period that included 50 weeks or more would be necessary. This number of  
359 “50 weeks” as survey duration may depend on the number of infection waves as well as the number  
360 of data plots to discuss the correlation between virus concentration in wastewater and infection

361 incidence. During the comprehensive, notifiable disease surveillance period, approximately two  
362 infection waves were observed over 50 weeks. High correlation coefficients were also observed in  
363 other analyses using sentinel surveillance data (49 weeks with two infection waves: Preliminary  
364 analysis 1 and Main analysis 1).

365 Regarding analytical reproducibility (Main analysis 4), when the standard deviations of the analysis  
366 were large, the uncertainty intervals were wide, particularly for a small number of samples. The  
367 2.5th percentile values of the correlation coefficients were below 0.7 when the standard deviation  
368 was 0.6 or more for the three samples per week. A standard deviation of 0.4 or less was considered  
369 desirable in terms of analytical reproducibility.

370 Overall, it is considered desirable to use an analytical method that can quantify SARS-CoV-2 RNA  
371 in wastewater samples with high detectability and reproducibility (non-detect rate: < 40%; standard  
372 deviation:  $\leq 0.4$ ) and to survey at least three samples per week, preferably five or more samples, for  
373 50 weeks or more.

374 This study has some limitations: First, although this study focused on wastewater survey methods, it  
375 did not examine clinical factors (e.g., COVID-19 prevalence or testing coverage) or environmental  
376 factors (e.g., air temperature or catchment population). Second, among the wastewater survey  
377 methods, this study did not examine factors that affect virus recovery rates during the analytical  
378 process, such as polymerase chain reaction inhibition. Third, the findings of this study were based  
379 on the City of Sapporo, and there is room for further research on the applicability of these findings  
380 to other catchment areas. The analyses examined in this study are expected to expand to various

381 catchment areas, and the accumulation and integration of results will increase the generality of the  
382 findings.

383

## 384 **5. Conclusions**

385 The use of the WBE is sufficient to determine the incidence of COVID-19 in catchment areas.

386 Furthermore, the WBE can present additional informational value with respect to understanding the  
387 infection incidence of a catchment, as estimated by the 48% reduction in confirmed COVID-19  
388 cases visiting health facilities after the reclassification of COVID-19 in Japan.

389 By examining the correlation between SARS-CoV-2 RNA concentrations in wastewater and  
390 confirmed COVID-19 cases under hypothetical conditions in which the quality of wastewater  
391 survey methods has declined, this study identified WBE survey methods that are necessary for  
392 understanding the infection situation in a catchment. The findings of the appropriate WBE survey  
393 methods obtained in this study are as follows:

- 394 ● Non-detect data should be replaced by distribution estimates (or LOD/2).
- 395 ● The geometric mean (or median) should be used to calculate representative values.
- 396 ● A quantifiable and highly reproducible method (non-detect rate: < 40%; standard deviation:  $\leq$   
397 0.4) is necessary for the analysis of SARS-CoV-2 RNA in samples.
- 398 ● The sampling frequency required is at least three samples per week, preferably five samples per  
399 week.
- 400 ● Surveys need to be conducted for a period of time that includes at least 50 weeks or longer.

401

402 **Acknowledgements**

403 We would like to thank Editage ([www.editage.com](http://www.editage.com)) for English language editing. This work was  
404 supported by “The Nippon Foundation - Osaka University Project for Infectious Disease  
405 Prevention,” the Japan Agency for Medical Research and Development (AMED) under grant  
406 number 24fk0108713h0001, and the Japan Science and Technology Agency (JST) through the JST-  
407 Mirai Program, under grant number JPMJMI22D1. The funders had no role in study design, data  
408 collection and analysis, decision to publish, or preparation of the manuscript.

409

410 **Author contributions**

411 MM: Conceptualization, Methodology, Formal analysis, Investigation, Visualization, Funding  
412 acquisition, Writing – original draft.

413 HA: Resources, Writing – review & editing.

414 RY: Resources, Writing – review & editing.

415 MK: Conceptualization, Resources, Funding acquisition, Writing – review & editing.

416

417 **Declaration of interests**

418 MM: A relationship with NJS CO LTD that includes: consulting or advisory.

419 HA: No competing interests to declare.

420 RY: No competing interests to declare.

421 ML: A relationship with AdvanSentinel that includes: funding grants and lecture honorarium. A  
422 relationship with Shimadzu Corporation that includes: funding grants. A relationship with Shionogi  
423 & Co. that includes: funding grants and lecture honorarium. Patent pending to Shionogi & Co., Ltd.

424

## 425 **References**

426 Ahmed, W., Angel, N., Edson, J., Bibby, K., Bivins, A., O'Brien, J.W., et al., 2020. First confirmed  
427 detection of SARS-CoV-2 in untreated wastewater in Australia: A proof of concept for the  
428 wastewater surveillance of COVID-19 in the community. *Sci. Total Environ.* 728, 138764.

429 Ando, H., Iwamoto, R., Kobayashi, H., Okabe, S., Kitajima, M., 2022. The Efficient and Practical  
430 virus Identification System with ENhanced Sensitivity for Solids (EPISENS-S): A rapid and  
431 cost-effective SARS-CoV-2 RNA detection method for routine wastewater surveillance. *Sci.*  
432 *Total Environ.* 843, 157101.

433 Ando, H., Murakami, M., Ahmed, W., Iwamoto, R., Okabe, S., Kitajima, M., 2023. Wastewater-  
434 based prediction of COVID-19 cases using a highly sensitive SARS-CoV-2 RNA detection  
435 method combined with mathematical modeling. *Environ. Int.* 173, 107743.

436 Betancourt, W.Q., Schmitz, B.W., Innes, G.K., Prasek, S.M., Pogreba Brown, K.M., Stark, E.R., et  
437 al., 2021. COVID-19 containment on a college campus via wastewater-based epidemiology,  
438 targeted clinical testing and an intervention. *Sci. Total Environ.* 779, 146408.

439 City of Sapporo, 2024. <https://www.city.sapporo.jp/hokenjo/f1kansen/2019n-covhassei.html>  
440 (accessed May 9, 2024). (in Japanese)

441 Croghan, C.W., Egeghy, P.P., 2003. Methods of dealing with values below the limit of detection  
442 using SAS.  
443 [https://cfpub.epa.gov/si/si\\_public\\_record\\_report.cfm?Lab=NERL&dirEntryId=64046](https://cfpub.epa.gov/si/si_public_record_report.cfm?Lab=NERL&dirEntryId=64046)  
444 (accessed May 9, 2024).

445 Data-smart City Sapporo, 2023. [https://ckan.pf-sapporo.jp/dataset/covid\\_19\\_patients](https://ckan.pf-sapporo.jp/dataset/covid_19_patients) (accessed  
446 May 9, 2024). (in Japanese)

447 Grabow, W.O.K., Botma, K.L., De Villiers, J.C., Clay, C.G., Erasmus, B., 1999. Assessment of cell  
448 culture and polymerase chain reaction procedures for the detection of polioviruses in  
449 wastewater. *Bull. World Health Organ.* 77, 973-980.

450 Hart, O.E., Halden, R.U., 2020. Computational analysis of SARS-CoV-2/COVID-19 surveillance  
451 by wastewater-based epidemiology locally and globally: Feasibility, economy, opportunities  
452 and challenges. *Sci. Total Environ.* 730, 138875.

453 Karthikeyan, S., Levy, J.I., De Hoff, P., Humphrey, G., Birmingham, A., Jepsen, K., et al., 2022.  
454 Wastewater sequencing reveals early cryptic SARS-CoV-2 variant transmission. *Nature.* 609,  
455 101-108.

456 Kitajima, M., Ahmed, W., Bibby, K., Carducci, A., Gerba, C.P., Hamilton, K.A., et al., 2020. SARS-  
457 CoV-2 in wastewater: State of the knowledge and research needs. *Sci. Total Environ.* 739,  
458 139076.

459 Kitajima, M., Murakami, M., Kadoya, S.S., Ando, H., Kuroita, T., Katayama, H., et al., 2022.  
460 Association of SARS-CoV-2 load in wastewater with reported COVID-19 cases in the

- 461 Tokyo 2020 Olympic and Paralympic Village from July to September 2021. *JAMA Netw.*  
462 *Open.* 5, e2226822.
- 463 Klapsa, D., Wilton, T., Zealand, A., Bujaki, E., Saxentoff, E., Troman, C., et al., 2022. Sustained  
464 detection of type 2 poliovirus in London sewage between February and July, 2022, by  
465 enhanced environmental surveillance. *Lancet.* 400, 1531-1538.
- 466 Kuroita, T., Yoshimura, A., Iwamoto, R., Ando, H., Okabe, S., Kitajima, M., 2024. Quantitative  
467 analysis of SARS-CoV-2 RNA in wastewater and evaluation of sampling frequency during  
468 the downward period of a COVID-19 wave in Japan. *Sci. Total Environ.* 906, 166526.
- 469 La Rosa, G., Iaconelli, M., Mancini, P., Bonanno Ferraro, G., Veneri, C., Bonadonna, L., et al., 2020.  
470 First detection of SARS-CoV-2 in untreated wastewaters in Italy. *Sci. Total Environ.* 736,  
471 139652.
- 472 Lee, L., 2022. Package 'NADA'. <https://cran.r-project.org/web/packages/NADA/NADA.pdf>  
473 (accessed May 9, 2024).
- 474 Li, X., Liu, H., Gao, L., Sherchan, S.P., Zhou, T., Khan, S.J., et al., 2023a. Wastewater-based  
475 epidemiology predicts COVID-19-induced weekly new hospital admissions in over 150  
476 USA counties. *Nat. Commun.* 14, 4548.
- 477 Li, X., Zhang, S., Sherchan, S., Orive, G., Lertxundi, U., Haramoto, E., et al., 2023b. Correlation  
478 between SARS-CoV-2 RNA concentration in wastewater and COVID-19 cases in  
479 community: A systematic review and meta-analysis. *J. Hazard. Mater.* 441, 129848.
- 480 Li, X., Zhang, S., Shi, J., Luby, S.P., Jiang, G., 2021. Uncertainties in estimating SARS-CoV-2



481 prevalence by wastewater-based epidemiology. *Chem. Eng. J.* 415, 129039.

482 Medema, G., Been, F., Heijnen, L., Petterson, S., 2020. Implementation of environmental  
483 surveillance for SARS-CoV-2 virus to support public health decisions: Opportunities and  
484 challenges. *Curr. Opin. Environ. Sci. Health.* 17, 49-71.

485 Ministry of Health Labour and Welfare, 2023. <https://www.mhlw.go.jp/content/001065724.pdf>  
486 (accessed May 9, 2024). (in Japanese)

487 Murakami, M., Hata, A., Honda, R., Watanabe, T., 2020. Letter to the editor: Wastewater-based  
488 epidemiology can overcome representativeness and stigma issues related to COVID-19.  
489 *Environ. Sci. Technol.* 54, 5311.

490 Our World in Data, 2024. SARS-CoV-2 variants in analyzed sequences.  
491 <https://ourworldindata.org/grapher/covid-variants-area?country=~JPN> (accessed May 13,  
492 2024).

493 R Development Core Team, 2021. R 4.2.0. R: A language and environment for statistical computing.  
494 R Foundation for Statistical Computing. Vienna, Austria.

495 Randazzo, W., Truchado, P., Cuevas-Ferrando, E., Simón, P., Allende, A., Sánchez, G., 2020.  
496 SARS-CoV-2 RNA in wastewater anticipated COVID-19 occurrence in a low prevalence  
497 area. *Water Res.* 181, 115942.

498 Schoen, M.E., Bidwell, A.L., Wolfe, M.K., Boehm, A.B., 2023. United States influenza 2022-2023  
499 season characteristics as inferred from wastewater solids, influenza hospitalization, and  
500 syndromic data. *Environ. Sci. Technol.* 57, 20542-20550.

501 Shah, S., Gwee, S.X.W., Ng, J.Q.X., Lau, N., Koh, J., Pang, J., 2022. Wastewater surveillance to  
502 infer COVID-19 transmission: A systematic review. *Sci. Total Environ.* 804, 150060.

503 Toribio-Avedillo, D., Gómez-Gómez, C., Sala-Comorera, L., Rodríguez-Rubio, L., Carcereny, A.,  
504 García-Pedemonte, D., et al., 2023. Monitoring influenza and respiratory syncytial virus in  
505 wastewater. *Beyond COVID-19. Sci. Total Environ.* 892, 164495.

506

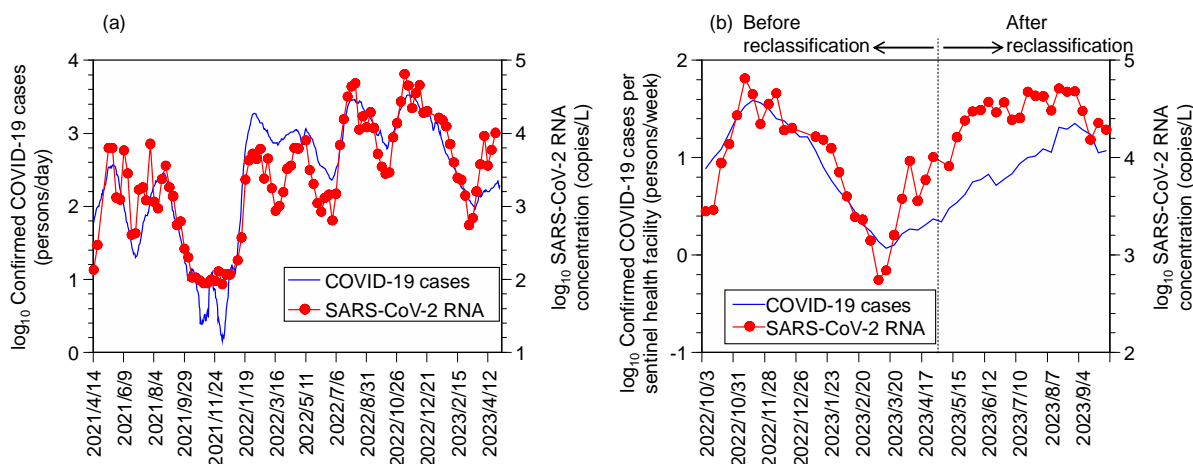

507

508 Figure 1. Temporal changes of SARS-CoV-2 concentrations in wastewater and confirmed COVID-

509 19 cases. (a) Comprehensive, notifiable disease surveillance data; (b) sentinel surveillance data. The

510 SARS-CoV-2 RNA concentration in wastewater was calculated based on the geometric mean values

511 for one week (15 samples). The non-detect data were replaced using the distribution estimates.

512

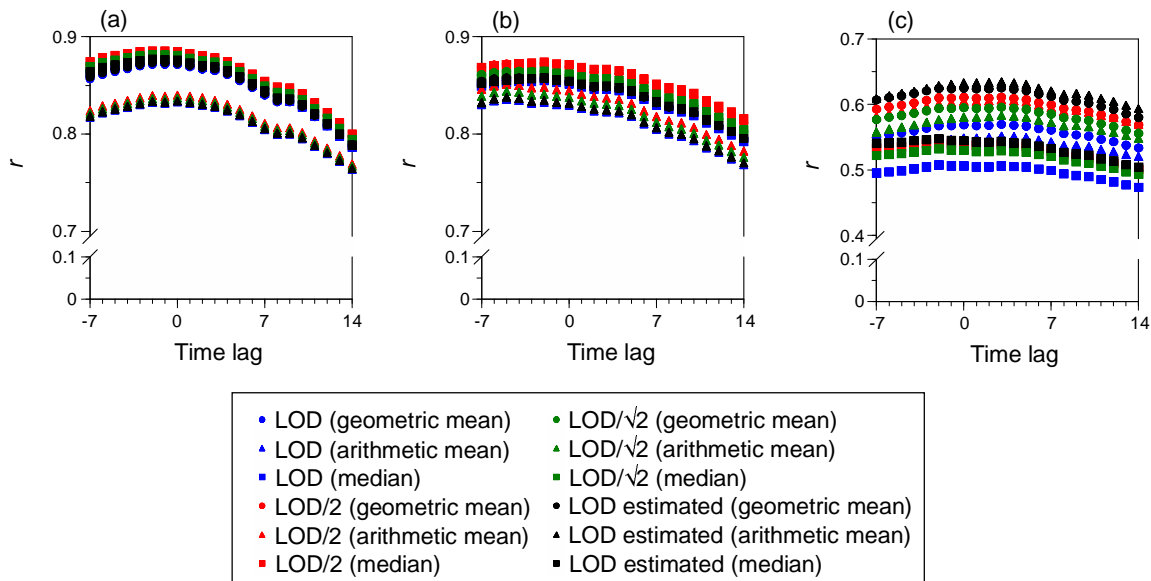

513

514 Figure 2. Comparison of Pearson's correlation coefficients ( $r$ ) based on treatment of non-detect data

515 and different methods of calculating representative values. (a) Without PMMoV correction, limit of

516 detection (LOD) = 93.1 copies/L; (b) with PMMoV correction, LOD = 93.1 copies/L; and (c)

517 without PMMoV correction, LOD = 9,310 copies/L. Time lag represents the “published date of the

518 number of infected individuals” minus the “representative date of wastewater sampling.” LOD/2,

519 LOD/ $\sqrt{2}$ , and LOD estimated represent the replacement of LOD values by LOD/2, LOD/ $\sqrt{2}$ , and

520 distribution estimates, respectively.

521

522

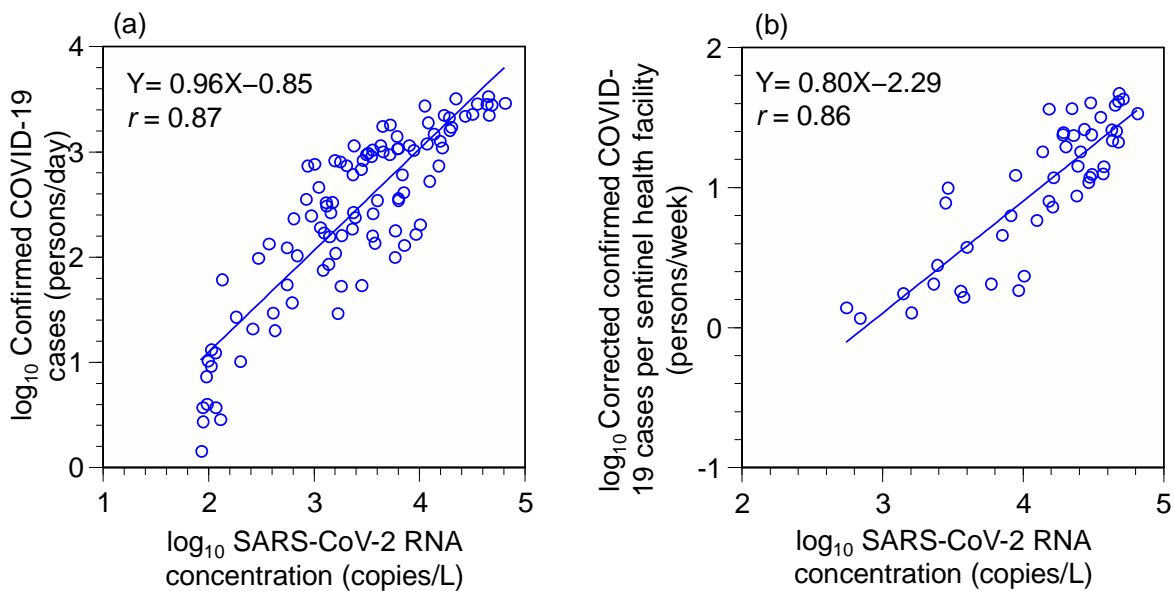

523

524 Figure 3. Scatterplots of SARS-CoV-2 RNA concentration vs. confirmed COVID-19 cases. (a)

525 Comprehensive, notifiable disease surveillance data; (b) sentinel surveillance data.  $r$ : Pearson

526 correlation coefficients.

527

528

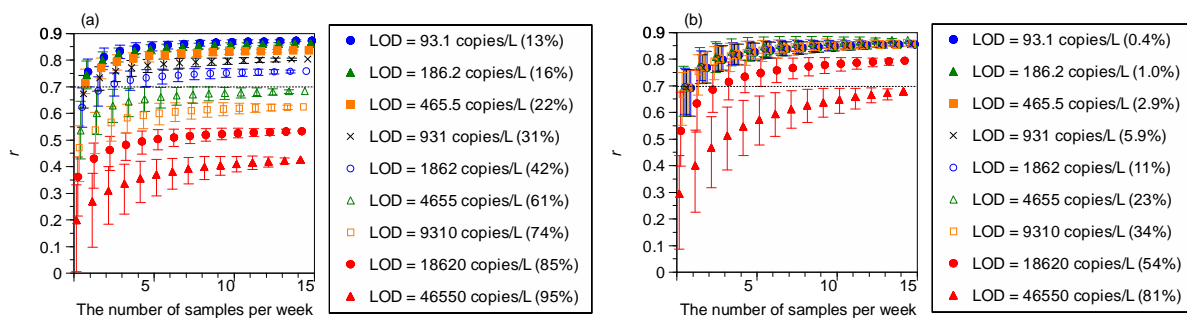

529

530 Figure 4. Pearson correlation coefficients ( $r$ ) between SARS-CoV-2 RNA concentrations and the

531 confirmed COVID-19 cases according to the number of samples per week and analytical sensitivity.

532 (a) Comprehensive, notifiable disease surveillance data; (b) sentinel surveillance data. LOD: limit

533 of detection. The number in parenthesis represents the non-detect rate. An error bar represents a

534 95% uncertainty interval.

535

536

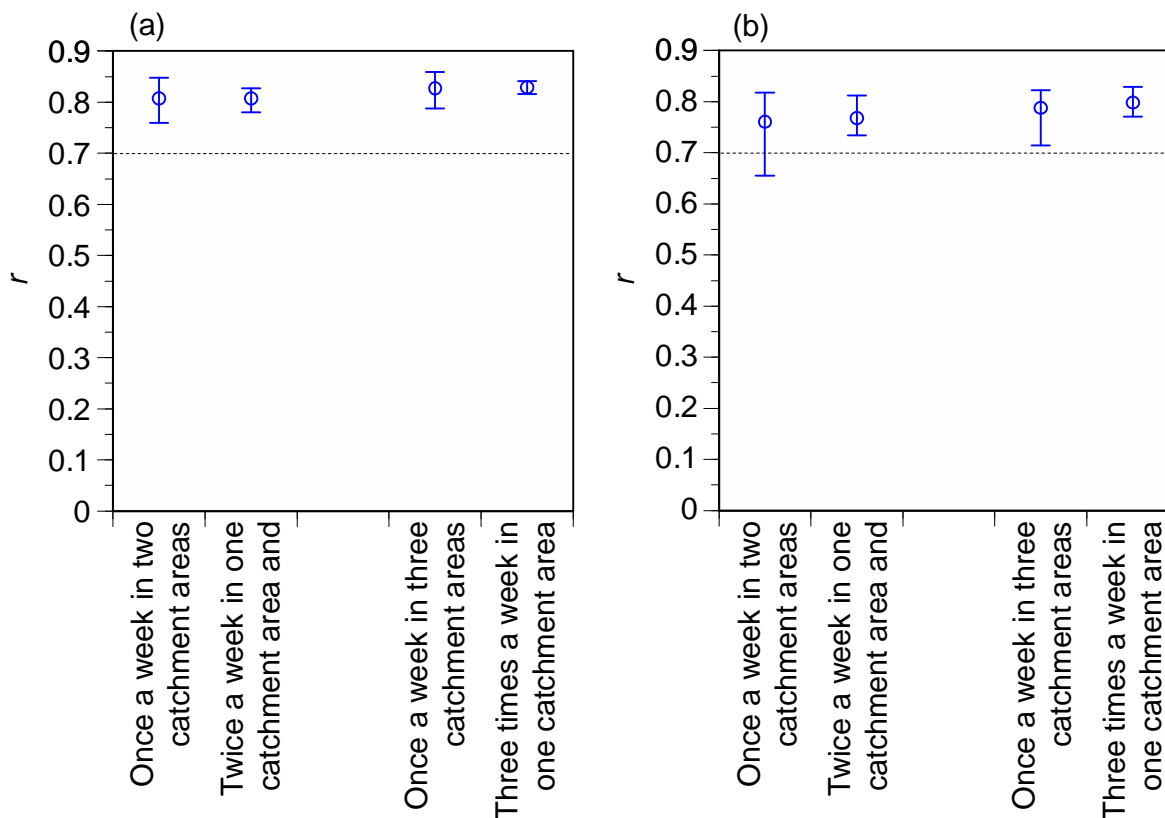

537

538 Figure 5. Comparison of surveys at multiple catchment areas on the same day of the week and at the

539 same catchment area on multiple days of the week. (a) Comprehensive, notifiable disease

540 surveillance data; (b) sentinel surveillance data. The  $r$  represents the Pearson correlation coefficient

541 between SARS-CoV-2 RNA concentrations and the confirmed COVID-19 cases. An error bar

542 represents a 95% uncertainty interval.

543

544

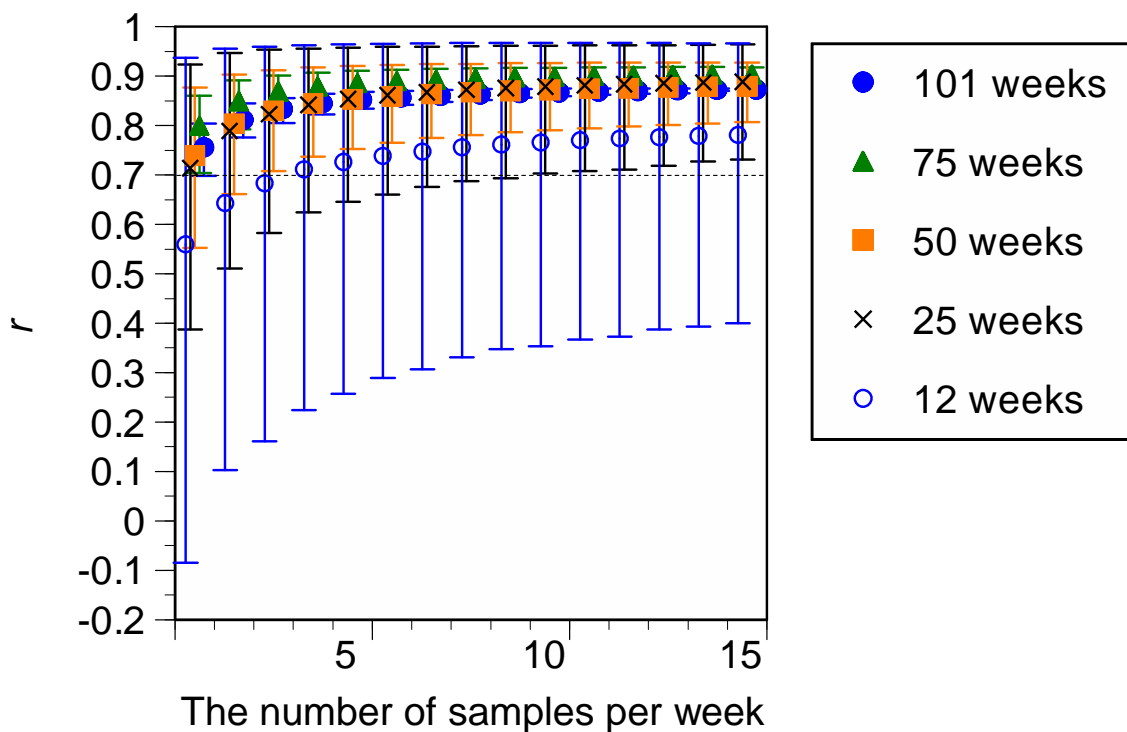

545

546 Figure 6. Pearson correlation coefficients ( $r$ ) between SARS-CoV-2 RNA concentrations and the

547 confirmed COVID-19 cases according to the number of samples per week and survey duration. (a)

548 Comprehensive notifiable disease surveillance data; (b) sentinel surveillance data. An error bar

549 represents a 95% uncertainty interval.

550

551



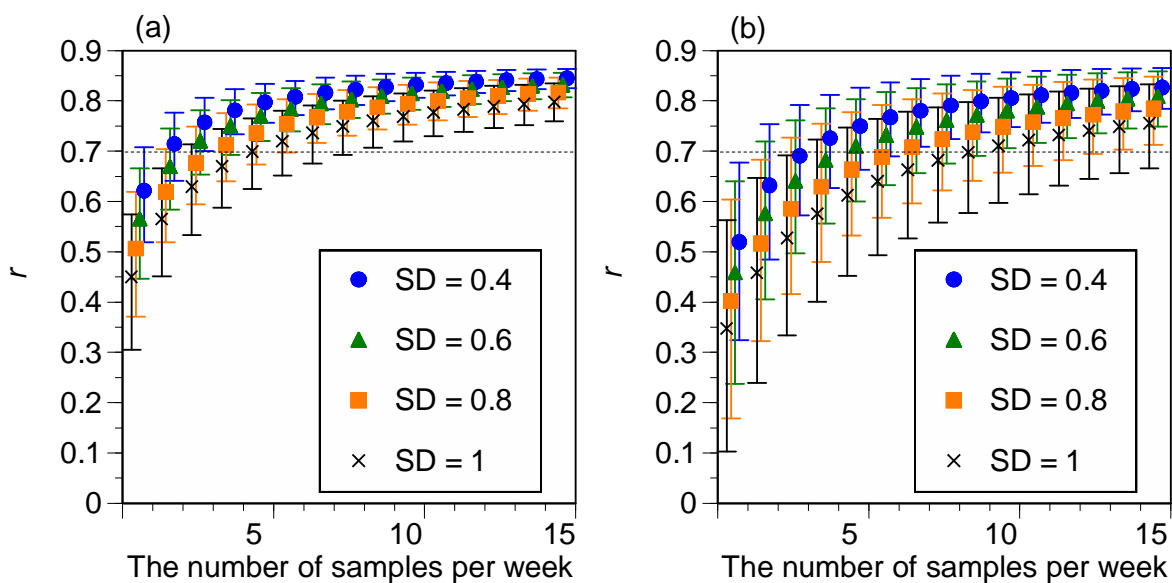

552

553 Figure 7. Pearson correlation coefficients ( $r$ ) between SARS-CoV-2 RNA concentrations and the

554 confirmed COVID-19 cases according to the number of samples per week and analytical

555 reproducibility. (a) Comprehensive, notifiable disease surveillance data; (b) sentinel surveillance

556 data. SD: standard deviation. An error bar represents a 95% uncertainty interval.

557
